# Supplementary material for: Analysis of Resin-Based Dental Materials’ Composition Depending on Their Clinical Applications
Source: MDPI journal article supplement (doi:10.3390/polym16081022), 2024-04-09
Supplement: s1 [file s1]

Supplementary material: Table S1. manufacturers and number of materials first identified for each category

| Manufacturer          | Restorative composite resins | Core build up composite resins | Orthodontic composite resins |
|-----------------------|------------------------------|--------------------------------|------------------------------|
| Apol                  | 7                            | 4                              | /                            |
| American orthodontics | /                            | /                              | 4                            |
| Bisico                | 12                           | 4                              | /                            |
| Biodinamica           | /                            | /                              | 1                            |
| BJM                   | /                            | /                              | 2                            |
| Cavex                 | 3                            | /                              | /                            |
| Centrix dental        | 3                            | 5                              | /                            |
| Coltene               | 11                           | 1                              | /                            |
| Cosmedent             | 8                            | 1                              | /                            |
| CyberTech             | 2                            | 1                              | /                            |
| Dentaurum             | /                            | /                              | 3                            |
| DenMat                | 4                            | 1                              | /                            |
| Dental Technologies   | 5                            | 2                              | 2                            |
| Dentsply              | 14                           | 2                              | /                            |
| DMG                   | 6                            | 2                              | /                            |
| DMP                   | /                            | /                              | 1                            |
| Elsodent              | 5                            | 3                              | /                            |
| Exotec                | 5                            | 2                              | /                            |
| FGM                   | 6                            | 1                              | 2                            |
| GC                    | 20                           | 1                              | 3                            |
| Gestenco              | /                            | /                              | 1                            |
| Henry Schein          | 7                            | /                              | /                            |
| Itena                 | 2                            | 1                              | /                            |
| Ivoclar-Vivadent      | 15                           | 2                              | 1                            |
| Jeneric Pentron       | 5                            | 2                              | /                            |
| Kent Dental           | 6                            | /                              | /                            |
| Kerr                  | 11                           | 2                              | /                            |
| Kettenbach Dental     | 2                            | 1                              | /                            |
| Kulzer                | 15                           | /                              | /                            |
| Kuraray               | 13                           | 3                              | /                            |
| Leone                 | /                            | /                              | 2                            |
| 3M                    | 13                           | /                              | 6                            |
| Micerium              | 5                            | /                              | /                            |
| Ormco                 | /                            | /                              | 4                            |
| Ortho Technology      | /                            | /                              | 3                            |
| Parkell               | 3                            | 2                              | /                            |
| Prime Dental          | /                            | /                              | 3                            |
| Pulpdent              | 2                            | 1                              | 1                            |

|                 |     |    |    |
|-----------------|-----|----|----|
| Reliance        | /   | /  | 13 |
| RMO             | /   | /  | 5  |
| R&S             | 6   | /  | /  |
| Saremco         | 6   | /  | /  |
| Schütz Dental   | 8   | /  | /  |
| Septodont       | 7   | 1  | /  |
| Shofu           | 10  | /  | 1  |
| SDI             | 11  | /  | /  |
| Sun Medical     | 4   | /  | /  |
| Tokuyama        | 11  | /  | /  |
| TP Orthodontics | /   | /  | 3  |
| Ultradent       | 5   | 1  | 2  |
| Vericom         | /   | /  | 1  |
| Voco            | 27  | 3  | 2  |
| Total           | 305 | 49 | 66 |

| Restorative adhesive systems | Orthodontic adhesive systems | Sealants | Resin modified glass ionomer cements |
|------------------------------|------------------------------|----------|--------------------------------------|
| 3                            | /                            | 1        | /                                    |
| /                            | 3                            | /        | /                                    |
| 9                            | /                            | 1        | /                                    |
| /                            | /                            | /        | /                                    |
| /                            | 1                            | /        | /                                    |
| 2                            | /                            | /        | /                                    |
| 1                            | /                            | /        | /                                    |
| 5                            | /                            | /        | /                                    |
| 1                            | /                            | 2        | /                                    |
| 2                            | /                            | 1        | /                                    |
| /                            | 1                            | /        | /                                    |
| 6                            | /                            | 1        | 2                                    |
| 4                            | 1                            | 2        | /                                    |
| 5                            | /                            | 1        | /                                    |
| 4                            | /                            | /        | /                                    |
| /                            | /                            | /        | /                                    |
| 4                            | /                            | 1        | /                                    |
| 4                            | /                            | 1        | /                                    |
| 2                            | /                            | /        | /                                    |
| 5                            | /                            | /        | 3                                    |
| /                            | /                            | /        | /                                    |
| 3                            | /                            | 1        | 1                                    |
| 2                            | /                            | 1        | /                                    |
| 8                            | /                            | 4        | /                                    |
| 2                            | /                            | /        | 1                                    |
| 2                            | /                            | /        | /                                    |
| 5                            | /                            | /        | /                                    |
| /                            | /                            | /        | /                                    |
| 3                            | /                            | /        | /                                    |
| 7                            | /                            | 1        | /                                    |
| /                            | 1                            | /        | /                                    |
| 8                            | 3                            | 2        | 5                                    |
| 3                            | /                            | 1        | /                                    |
| /                            | 1                            | /        | /                                    |
| /                            | 1                            | /        | /                                    |
| 3                            | /                            | /        | /                                    |
| /                            | 2                            | /        | /                                    |
| 3                            | 1                            | 2        | 1                                    |

|     |    |    |    |
|-----|----|----|----|
| /   | 10 | /  | /  |
| /   | 2  | /  | /  |
| 2   | /  | /  | /  |
| 5   | /  | 1  | /  |
| 2   | /  | /  | /  |
| 2   | /  | /  | /  |
| 4   | 1  | 1  | /  |
| 3   | /  | 1  | 2  |
| 1   | /  | /  | /  |
| 6   | /  | /  | /  |
| /   | 3  | /  | /  |
| 5   | /  | 2  | /  |
| /   | 1  | /  | /  |
| 6   | 1  | 4  | 1  |
| 142 | 33 | 32 | 16 |

**Luting cements and  
composites**

3

/

4

/

/

/

1

3

2

/

/

/

2

3

2

/

2

3

2

10

/

2

3

5

4

/

5

1

1

5

/

5

4

/

/

2

/

3

/

/

/

1

1

2

2

4

1

2

/

4

/

6

**100**
